# Supplementary material
Source: Springer Nature journal article supplement (https://springermedizin.de/resource/supplementary/12931_2012_1253_MOESM4_ESM.pdf/9425832)

**AZD8848 60  $\mu$ g**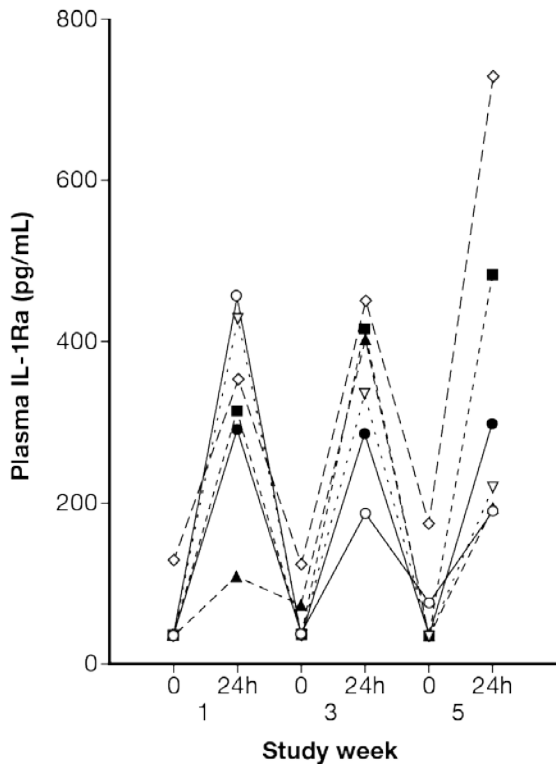**Placebo**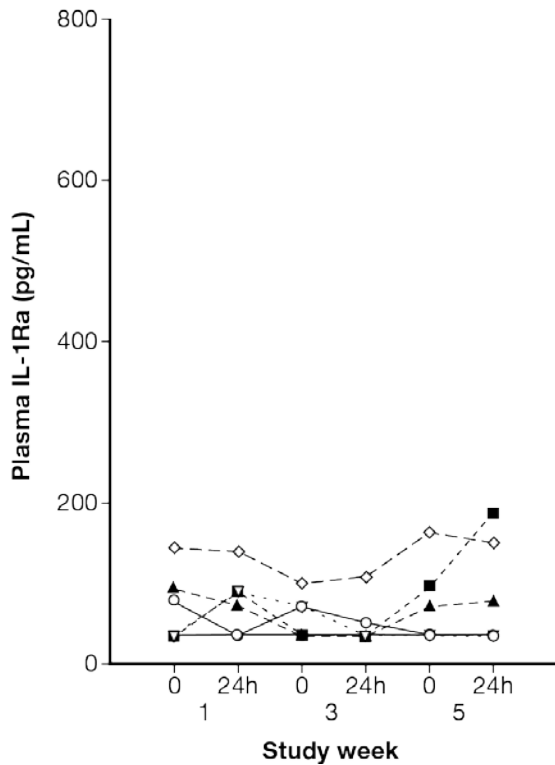

Supplement: MOESM4 [file 9425832]
